24 **Abstract**

25 Vestigial organs are historical echoes of past phenotypes. Determining whether a  
26 specific organ constitutes a functional or vestigial structure can be a challenging task,  
27 given that distinct levels of atrophy may arise between and within lineages. The  
28 mammalian pineal gland, an endocrine organ involved in melatonin biorhythmicity,  
29 represents a classic example, often yielding contradicting anatomical observations.  
30 In Xenarthra (sloths, anteaters and armadillos), a peculiar mammalian order, the  
31 presence of a distinct pineal organ was clearly observed in some species (i.e.  
32 Linnaeus's two-toed sloth) but undetected in other closely related species (i.e.  
33 brown-throated sloth). In the nine-banded armadillo, contradicting evidence  
34 supports either functional or vestigial scenarios. Thus, to untangle the physiological  
35 status of the pineal gland in Xenarthra, we used a genomic approach to investigate  
36 the evolution of the gene hub responsible for melatonin synthesis and signaling. We  
37 show that both synthesis and signaling compartments are eroded and were lost  
38 independently. Additionally, by expanding our analysis to 157 mammal genomes we  
39 offer a comprehensive view showing that species with very distinctive habitats and  
40 lifestyles have convergently evolved a similar phenotype: Cetacea, Pholidota,  
41 Dermoptera, Sirenia and Xenarthra. Our findings suggest that the recurrent  
42 inactivation of melatonin genes correlates with pineal atrophy, and endorse the use  
43 of genomic analyses to ascertain the physiological status of suspected vestigial  
44 structures.

45

46 **Keywords:** Gene Loss; Vestigiality; Pineal Gland; Xenarthra

47

48

49

50

51

52

53

54

55

56

57

58

59

## 60 1. Introduction

61 Understanding the evolution of organ reduction, atrophy or indeed complete loss is  
62 a fascinating quest, dating back to the seminal work of Charles Darwin, *On the Origin*  
63 *of Species* (Darwin, 1859). Yet, to identify a structure as vestigial, described as a trait  
64 with no function, operating sub-optimally, or even with a modified function from that  
65 originally served, is no easy undertaking (Werth, 2014; Allmon & Ross, 2018): often  
66 yielding contradictory anatomical descriptions (e.g., Jacob et al., 2000; Nweeia et al.,  
67 2012). The increasing availability of whole genome sequences, on the other hand,  
68 provides novel tools to untangle genomic signatures impacting organ reduction or  
69 loss (e.g. Zoonomia Consortium, 2020). A key question is thus to understand how  
70 genomic changes impact these processes. Among such signatures we find, more  
71 commonly than initially anticipated, gene loss episodes: such as in the morphological  
72 simplification of the urochordate *Oikopleura dioica*, the eye regression observed in  
73 cave-dwelling populations of the teleost *Astyanax mexicanus*, the loss of gastric  
74 glands in disparate vertebrate species or the loss of sebaceous glands in some  
75 mammalian lineages (e.g., Olson, 1999; Castro et al., 2014; Albalat & Cañestro, 2016;  
76 Cronk, 2009, Guijarro-Clarke et al. 2020; McGaugh et al., 2014; Springer et al. 2018;  
77 Lopes-Marques et. a 2019a; Themudo et al., 2020; Springer et al., 2021).

78 A remarkable example of inconsistent observations in the functionality *versus*  
79 vestigiality of an organ can be found in the anatomical observations of the pineal  
80 gland in mammals (Ralph, 1975). The pineal gland is a small endocrine organ present  
81 in the brain and playing a central role in the development of entrainment behaviors  
82 through the action of melatonin (circadian rhythmicity). From a physiological  
83 standpoint, melatonin synthesis occurs in a specialized cell type, the pinealocyte,  
84 through an enzymatic cascade involving the arylalkylamine *N*-acetyltransferase  
85 (*Aanat*) and *N*-acetylserotonin methyltransferase (*Asmt*) enzymes (Klein et al., 1997;  
86 Simonneaux & Ribelayga, 2003); subsequent signaling uses a set of high affinity  
87 receptors, *Mtnr1A* and *Mtnr1B*, involved in the response of the clock machinery to  
88 melatonin stimulation, leading to local and overt phase shifts (Figure 1) (Axelrod et  
89 al., 1964; Lewy et al., 1980; Reppart et al., 1996). Although anatomical studies clearly  
90 support a well-defined pineal gland in most mammals, in lineages such as cetaceans,  
91 mole rats and sirenians a true pineal gland seems to be absent; yet, some equivocal

92 observations exist, ranging from complete absence to detectable presence of this  
93 gland in some species or in individuals within a species (Ralph, 1975; Ralph et al., 1985;  
94 Kim et al., 2011; Panin et al., 2012). Conflicting evidence reporting measurable levels  
95 of circulating melatonin (i.e. bottlenose dolphin) shed further doubt (Panin, 2012).  
96 Interestingly, gene loss signatures were identified in these lineages, supporting the  
97 loss-of-function of melatonin synthesis, a hallmark of pineal function, and/or  
98 signalling (Fang et al., 2014; Huelsmann et al., 2019; Lopes-Marques et al., 2019b),  
99 further demonstrating the power of genome analysis towards the clarification of  
100 organ function. The presence of a functional pineal gland is also contentious in  
101 Xenarthrans (armadillos, anteaters and sloths), a relatively understudied taxonomic  
102 group characterized by its intriguing nature (Figure 1; Oksche, 1965; Benítez et al.,  
103 1994; Superina & Loughry, 2015; Freitas et al., 2019) and representing one of the  
104 earliest-branching clades of placental mammals (Murphy et al., 2007; O’Leary et al.,  
105 2013). Xenarthrans are considered *imperfect* homeotherms, given their poor ability  
106 to adjust body temperature (Mc Nab, 1979; 1980; 1985). This inaptitude for thermal  
107 regulation, possibly related with their low metabolic rate and low energetic content  
108 diet, makes Xenarthrans’ activity patterns highly affected by air temperature, with  
109 potential effects in their circadian cycles (Chiarello, 1998; Giné et al., 2015; Maccarini  
110 et al., 2015; Di Blanco et al., 2017). While a recent report clearly identified pineal glands  
111 in the six-banded armadillo (*Euphractus sexcinctus*), Linnaeus’s two-toed sloth  
112 (*Choloepus didactylus*), and in the southern tamandua (*Tamandua tetradactyla*), a  
113 distinct pineal was not found or was reported missing in species such as southern  
114 long-nosed armadillo (*Dasypus hybridus*), pale-throated sloth (*Bradypus tridactylus*),  
115 giant anteater (*Myrmecophaga tridactyla*) or big hairy armadillo (*Chaetophractus*  
116 *villosus*) (Benítez et al., 1994; Ferrari, 1998; Freitas 2019). However, in the nine-banded  
117 armadillo (*Dasypus novemcinctus*) inconsistent reports advocate for either the  
118 presence or absence of a genuine pineal gland (Harlow et al., 1981; Freitas et al., 2019).  
119 Also, variable concentrations of circulating serum melatonin during the 24 h day–  
120 night cycle have been detected in this species, raising the hypothesis of an  
121 extrapineal source for melatonin production (Figure 1; Harlow et al., 1981; 1982). With  
122 the emergence of various whole-genome sequences from Pilosa (sloths and  
123 anteaters) (e.g., Uliano-Silva et al., 2019) and Cingulata (armadillos) (e.g., Lindblad-

124 Toh et al., 2011), Yin (et al., 2021) have recently reported the molecular erosion of  
 125 *Aanat* in *Xenarthra*; yet, no attempt was made to expand this analysis to the full  
 126 melatonin-related gene hub. Thus, we are now able to interrogate whether the gene  
 127 repertoire of circadian rhythmicity is modified in this lineage and clarify the  
 128 physiological status of the pineal gland within this group.  
 129

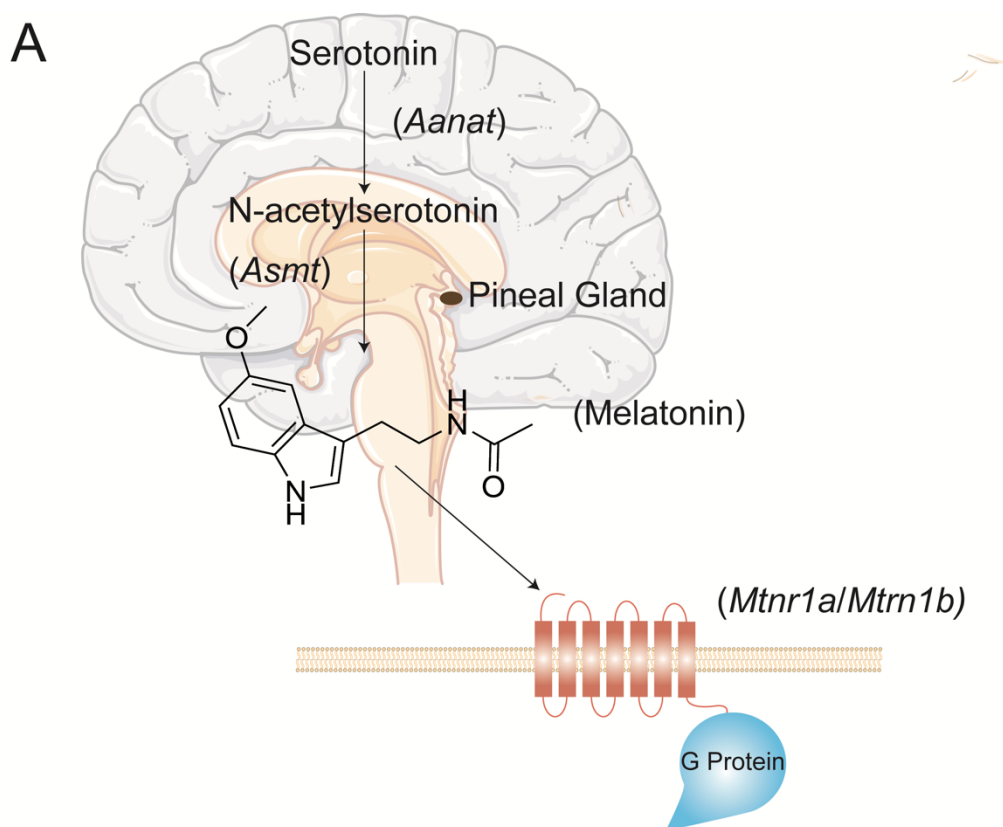

**B**

| Order     | Melatonin Blood levels | Pineal Gland Anatomy | Habits     |
|-----------|------------------------|----------------------|------------|
| Cingulata | Circadian              | Inconclusive         | Cathemeral |
| Pilosa    | No information         | Inconclusive         | Cathemeral |

130  
 131 Figure 1: Melatonin synthesis and signaling. Melatonin, generally described as a phase marker of the  
 132 circadian clock, is initially synthesized from tryptophan which is converted in serotonin (Pévet, 2002).  
 133 The final steps of this synthetic pathway include a two-step metabolization of the intermediate  
 134 serotonin into melatonin, a process catalyzed by *Aanat* and *Asmt* (Klein et al., 1997; Simonneaux &  
 135 Ribelayga, 2003). In mammals, *Mtnr1a* and *Mtnr1b* receptors, are involved in the response of the clock  
 136 machinery to melatonin stimulation (Reppart et al., 1996) (A). Summary of the available information

137 regarding Xenarthran's melatonin levels, pineal gland presence and habits (B). (Illustrations used  
138 elements from Servier Medical Art: <https://smart.servier.com/>)

139

## 140 **2. Material and Methods**

### 141 **2.1 Sequence collection**

142 To clarify the functional status of *Aanat*, *Asmt*, *Mtnr1a* and *Mtnr1b* in 8 Xenarthran  
143 species (Supplementary Data 1), the genomic *loci* were retrieved for gene annotation  
144 using three strategies (e.g. Alves et al., 2019; Lopes-Marques et al., 2019b): a) for  
145 species with annotated genes, the genomic sequence of the target gene (ranging  
146 from the upstream to the downstream flanking genes) was collected directly from  
147 NCBI; b) for species with annotated genomes but lacking the annotation of the target  
148 gene, the genomic region between two conserved flanking genes (downstream and  
149 upstream) was directly collected and c) for unannotated genomes, blastn searches  
150 were performed, using as query a set of three genes, including *Homo sapiens* (human)  
151 target gene coding sequence (CDS), as well as those of the flanking genes in the same  
152 species. From the blast results, the best matching genome scaffold corresponding to  
153 the consensus hit across those obtained per each query sequence was retrieved.  
154 When no consensual blast hit was obtained, all hits corresponding to the *H. sapiens*  
155 CDS query were inspected, the aligning regions submitted to a back-blast search  
156 against the nucleotide database of NCBI, with the matching genomic sequence  
157 corresponding to the gene of interest being the one selected (when existing). When  
158 several matchings were found, the best genomic scaffold (yielding the highest query  
159 coverage and identity value) was collected for annotation.

160 For the 156 non-Xenarthran mammals with annotated genomes (Supplementary Data  
161 1), the first two strategies described above were adopted to obtain the genomic  
162 region corresponding to the target gene. In Dugong (*Dugong dugon*), since no  
163 annotation is currently available, the genomic sequence containing the target gene  
164 was retrieved *via* blastn searches.

165

### 166 **2.2 Gene Annotation and Mutational Validation**

167 The open reading frames of the mammalian orthologues of *Aanat*, *Asmt*, *Mtnr1a* and  
168 *Mtnr1b* were investigated using *PseudoChecker* ([pseudochecker.ciimar.up.pt](http://pseudochecker.ciimar.up.pt)), an

169 online platform suitable for gene inactivation inference (Alves et al., 2020). For this  
170 purpose, the human gene orthologue was used as a comparative coding sequence  
171 input (NCBI Accession ID regarding human *Aanat*: NM\_001088.3; *Asmt*:  
172 NM\_001171039.1; *Mtnr1a*: NM\_005958.4; *Mtnr1b*: NM\_005959.5) to deduce the  
173 coding status of a given candidate gene in each target species. By making use of  
174 PseudoIndex - a user assistant metric built into the PseudoChecker pipeline that  
175 rapidly estimates the erosion condition of the tested genes – putative ORFs of the  
176 orthologous gene from each target species were assigned a discrete value from 0 to  
177 5, with 0 suggesting a fully functional gene and 5 complete inactivation (Alves et al.,  
178 2020). When PseudoIndex was higher than 2, we proceeded to manual annotation  
179 and validation of possible disrupting mutations as previously described by Lopes-  
180 Marques et al. (2019a, 2019b, 2019c). Briefly, by using *H. sapiens* CDS for each target  
181 gene as reference, each exon was isolated and mapped to the genomic region of the  
182 candidate pseudogenes using Geneious Prime (2019.2.3) “map to reference” tool.  
183 The aligned regions were individually screened for ORF disrupting mutations (exon  
184 deletions, sequence frameshifts and premature stop codons) and identified  
185 mutations were annotated. Mutational validation was performed through retrieval  
186 of raw sequencing reads in (at least) two independent Sequence Read Archive (SRA)  
187 projects (when available).

188

### 189 **2.3 RNA-seq analysis**

190 Transcriptomic analysis was performed as previously described by Lopes-Marques (et  
191 al., 2019c). Succinctly, RNA-seq datasets of multiple tissues were obtained from SRA  
192 projects to inspect the functional condition of each target gene in Xenarthran species  
193 (when available) and Human (*H. sapiens*) (Supplementary Data 2). Transcriptomic  
194 reads recovered through blastn, were mapped to corresponding references  
195 genomes using the “map to reference” tool from Geneious Prime (2019.2.3) and  
196 manually removed if presenting poor alignment. Finally, reads were classified as  
197 spliced reads (spanning over two exons), exon-intron reads or exonic reads  
198 depending on the genomic region they mapped.

199

## 200 **3. Results**

### 201 **3.1 Erosion of melatonin-related genes in Xenarthra**

202 To infer the coding state of the melatonin synthesis genes in armadillos, anteaters  
203 and sloths, we compared the genomic regions containing *Aanat* and *Asmt* in *H.*  
204 *sapiens* to the full genomes of 8 eight Xenarthran species and *L. africana*  
205 (Supplementary Data 1). Analysis using PseudoChecker (Alves et al., 2020), showed  
206 that all analysed species presented a PseudoIndex equal to 5 (Supplementary Data 3)  
207 - thus suggesting that the ORF of *Aanat* and *Asmt* includes inactivating mutations.  
208 Subsequent manual annotation of all collected Xenarthran genomic sequences  
209 revealed *Aanat* and *Asmt* gene erosion across all analysed species (Supplementary  
210 Data 4). Regarding *Aanat*, in agreement with Yin (et al., 2021), we found numerous  
211 ORF-disrupting mutations, including a conserved 1-nucleotide deletion in exon 1 in  
212 Armadillos and a conserved 2-nucleotide deletion in exon 3 in Sloths (Figure 2;  
213 Supplementary Data 4). On the other hand, although Yin (et al., 2021) were not able  
214 to recover the genomic sequence containing the *Aanat* CDS in Anteaters, we  
215 uncovered, among other disruptive mutations, a conserved in-frame premature stop  
216 codon in exon 2. The identified mutations were next validated by searching at least  
217 one ORF disruptive mutation per species in the corresponding SRAs; reads  
218 corroborating the identified mutations were systematically found (Supplementary  
219 Data 5). The analysis of *Asmt* in Xenarthra also revealed variable disruption patterns  
220 across Xenarthra. In cingulatan, we found similar mutational events, however not  
221 conserved within members of this group. Specifically, in *D. novemcinctus* exons 1 to 4  
222 and 7 were not found, possibly due to poor genome coverage or complete exon  
223 deletion (Figure 2). Moreover, in southern three-banded armadillo (*Tolypeutes*  
224 *matacus*) several insertions/deletions (indels) have been identified in exon 6,  
225 contrasting with *D. novemcinctus* where a validated in-frame premature stop codon  
226 in the same exon was detected (Figure 2; Supplementary Data 4 and 6). In  
227 *Vermilingua* (anteaters), we were only able to recover exons 4 and 5 in the Giant  
228 anteater (*Myrmecophaga tridactyla*) which provide a range of mutations with  
229 predicted disruptive effects (Figure 2; Supplementary Data 4). For Folivora (sloths),  
230 across several identified ORF-disrupting mutations, a trans-species conserved 4-  
231 nucleotide insertion in exon 6 was revealed and further validated by SRA searches  
232 (Supplementary Data 4 and 6). RNA-Seq analysis in Linnaeus's two-toed sloth



233 (*Choloepus didactylus*) *Aanat* yielded a high proportion of exon-intron reads versus  
 234 spliced reads, in clear contrast with the pattern found in *H. sapiens* (Supplementary  
 235 Data 7). In the case of *Asmt*, no transcriptomic reads were recovered for *C. didactylus*.  
 236 Similarly, SRA transcriptome searches were unable to retrieve reads of *D.*  
 237 *novemcinctus* for both genes.  
 238

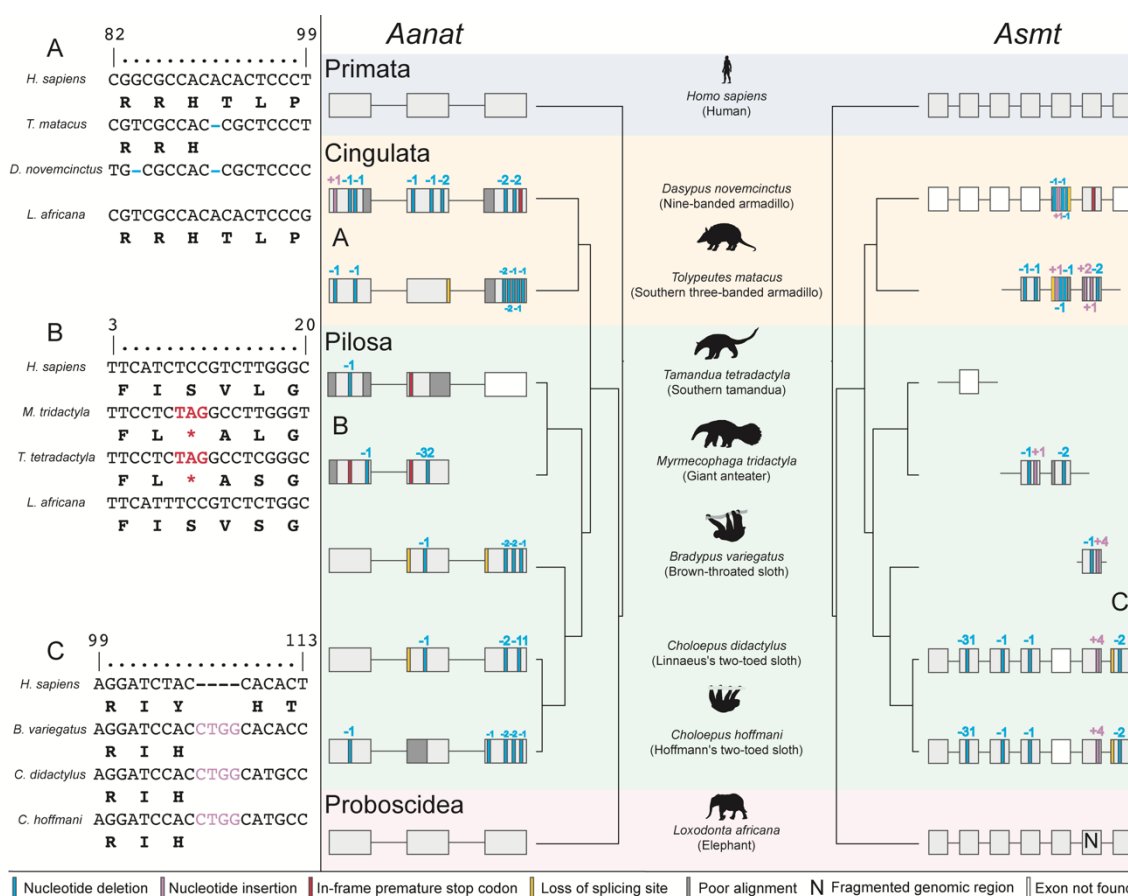

239  
 240 Figure 2: Schematic representation of the identified *Aanat* and *Asmt* genes ORF abolishing mutations  
 241 in Xenarthra orders (Cingulata and Pilosa). Phylogenetic trees were calculated in [www.timetree.org](http://www.timetree.org);  
 242 last accessed March 13, 2021 using species list. Silhouettes were sourced from Phylopic  
 243 (<http://phylopic.org>). Sequence alignments of the identified conserved disruptive mutations in both  
 244 *Aanat* and *Asmt* genes of Xenarthra.

245  
 246 We next examined the genes *Mtnr1a* and *Mtnr1b*, that encode G-protein coupled  
 247 receptors responsible for melatonin signalling. In *D. novemcinctus*, the *Mtnr1a* coding  
 248 status could not be accessed likely due to fragmentation of the respective genomic  
 249 region (presence of sequencing gaps (Ns)). On the other hand, for both species  
 250 comprising the two-toed sloth group (*Choloepus* sp.), we were able to identify a

251 validated 8-nucleotide deletion and a 20-nucleotide deletion in exon 2 together with  
252 a 4-nucleotide insertion in exon 1 (Figure 3; Supplementary Data 4 and 8). Curiously,  
253 in elephant (*Loxodonta africana*) exon 2 was not found despite the completeness of  
254 the assembly in the *Mtnr1a* region. The analysis of *Mtnr1b* CDS in *T. matacus* and  
255 Screaming hairy armadillo (*Chaetophractus vellerosus*) uncovered several inactivating  
256 mutations, including a conserved premature stop codon that truncates exon 2  
257 (Figure 3). Pilosa species (sloths and anteaters) *Mtnr1b* gene annotation revealed the  
258 presence of several ORF disrupting mutations, of note a single transversal mutation  
259 present in all analysed species, namely a 2-nucleotide deletion in exon 2 (Figure 3;  
260 Supplementary Data 4). This mutation was investigated and validated in both  
261 *Choloepus* species (Supplementary Data 9). Searches for transcriptomic evidence for  
262 *Mtnr1a* and *Mtnr1b* in *C. didactylus* retrieved a low number of reads, mostly  
263 corresponding to immaturely mRNA (Supplementary Data 7).

264

### 265 **3.2 Melatonin-related genes are inactivated in other non-xenarthran mammals**

266 We next expanded our analysis to non-Xenarthran mammal genomes (157), to  
267 address the coding status of *Aanat*, *Asmt*, *Mtnr1a* and *Mtnr1b* (Supplementary Data  
268 1). Sequence search and analysis for *Aanat* returned a total of 11 species with no  
269 annotation of a *Aanat*-like sequence: *Bison bison bison* (American bison), *Bos indicus*  
270 (Zebu), *Bos mutus* (Wild yak), *Bubalus bubalis* (Water buffalo), *Camelus ferus* (Wild  
271 bactrian camel), *Odocoileus virginianus texanus* (White-tailed deer), *Pantholops*  
272 *hodgsonii* (Tibetan antelope), *Sus scrofa* (Wild boar), *Myotis davidii* (David's myotis)  
273 and *Myotis lucifugus* (little brown bat). For the latter, we were not able to retrieve the  
274 genomic locus containing the target gene, given that both upstream and  
275 downstream flanking genes are also not annotated. Analysis using PseudoChecker  
276 (Alves et al., 2020), showed that 32 species non-Xenarthran mammals presented a  
277 PseudoIndex higher than 2 (Supplementary Data 3). From these species, members of  
278 Cetacea (cetaceans) and Pholidota (pangolins) presented among their members, a  
279 conserved (and validated) in-frame premature stop codon in Exon 1 (Supplementary  
280 Data 4 and 10). Moreover, we also found ORF-disrupting mutations in Exon 1 of  
281 velvety free-tailed bat (*Molossus molossus*), Kuhl's pipistrelle (*Pipistrellus kuhlii*) and  
282 Sunda flying lemur (*Galeopterus variegatus*) with the latter being validated through

283 SRA genomic reads (Supplementary Data 4 and 10). In *D. dugon*, several disruptive  
 284 mutations were identified, such as an eight-nucleotide insertion in exon 2 and the  
 285 presence of a stop codon in exon 3 (Supplementary Data 4 and 10).  
 286

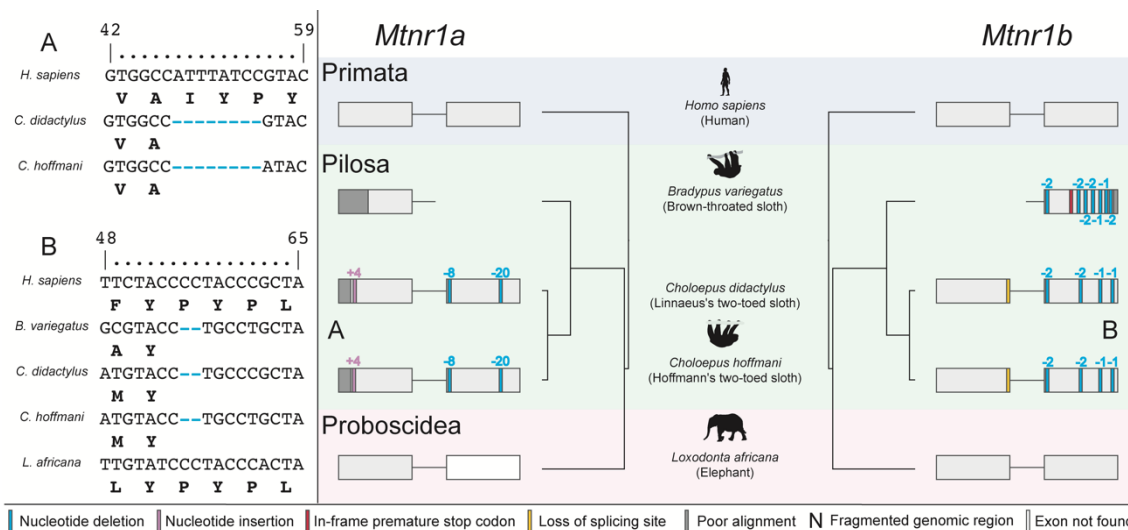

287  
 288 Figure 3: Schematic representation of the identified *Mtnr1a* and *Mtnr1b* genes ORF abolishing  
 289 mutations in Xenarthra orders (Cingulata and Pilosa). Phylogenetic trees were calculated in  
 290 www.timetree.org; last accessed March 13, 2021 using species list. Silhouettes were sourced from  
 291 Phylopic (<http://phylopic.org>). Sequence alignments of the identified conserved disruptive mutations  
 292 in both *Mtnr1a* and *Mtnr1b* genes of Xenarthra.

293  
 294 Regarding *Asmt*, in 17 species the genomic fragments containing *Asmt*-like nucleotide  
 295 sequences were not recovered given the lack of annotation for both target and  
 296 flanking genes (Supplementary Data 3). For this gene, 74 species displayed a  
 297 PseudoIndex higher than 2 (Supplementary Data 3), the majority due to  
 298 fragmentation of the genomic region (presence of Ns), true absence of exons, poor  
 299 alignment identity or incompleteness of the scaffold in the *Asmt* genomic region  
 300 (Supplementary Data 4). Gene lesion events were found and validated mostly in  
 301 Cetaceans, *G. variegatus*, *Manis* sp. (pangolins) and some Rodentia, with the latter  
 302 showing poor alignment identity with the reference (Figure 4; Supplementary Data 4  
 303 and 11). Other examples of species presenting disruptive mutations but with no SRA  
 304 validation (given that no genomic independent SRAs projects are available) include  
 305 Brandt's bat (*Myotis brandtii*), the Prairie vole (*Microtus ochrogaster*) with 2-  
 306 nucleotide deletion in exon 1 and the Nancy Ma's night monkey (*Aotus nancymae*)

307 with single nucleotide deletions in exon 2 (Supplementary Data 4). In the case of *D.*  
308 *dugon*, no ORF-disrupting mutations were found for *Asmt*, however, not all the exons  
309 were recovered due to incompleteness of the scaffold (Supplementary Data 4).  
310 We next expanded our search to understand whether melatonin signaling genes  
311 would be compromised in non-Xenarthran mammals. For *Mtnr1a*, a total of 44 species  
312 exhibited a PseudoIndex higher than 2 (Supplementary Data 3), yet manual curation  
313 revealed ORF-disrupting mutations only in pangolins (validated through SRA  
314 Projects; Supplementary Data 12) (Huelsmann et al., 2019), Hawaiian monk seal  
315 (*Neomonachus schauinslandi*) and *D. dugon* (Supplementary Data 4). In cetaceans a  
316 different scenario emerged, with several exons completely absent (Supplementary  
317 Data 4) (Huelsmann et al., 2019; Lopes-Marques et al., 2019b).  
318 In *Mtnr1b*, a total of 69 non-Xenarthran mammals displayed a PseudoIndex higher  
319 than 2 (Supplementary Data 3). However, and contrary to the pattern found for  
320 *Mtnr1a*, annotation of the collected sequences revealed *Mtnr1b* gene erosion across  
321 multiple species, mostly affecting the Carnivora and Cetaceans but also Pholidota,  
322 Sirenia and some Primates (Figure 4; Supplementary Data 4). Examples of conserved  
323 inactivating mutations were found in bears (*Ursus sp.*) with an in-frame premature  
324 stop codon in exon 1, weasels (*Mustela sp.*) sharing several indels in exon 2 and  
325 pangolins with a single nucleotide deletion and an in-frame premature stop codon in  
326 exon 1 (Supplementary Data 4 and 13). Other species with ORF-disruptive mutations  
327 include *Nannospalax galili* (northern Israeli blind subterranean mole rat), exhibiting a  
328 single nucleotide deletion in exon 1, *D. dugon* with a conserved fourteen-nucleotide  
329 deletion in exon 2 or *G. variegatus* with an indel also in exon 1 (Supplementary Data 4  
330 and 13). Detailed characterization of each target gene in mammals is available in  
331 Supplementary Data 4 and the minutiae of SRA validation can be found in  
332 Supplementary Data 10, 11, 12 and 13.  
333

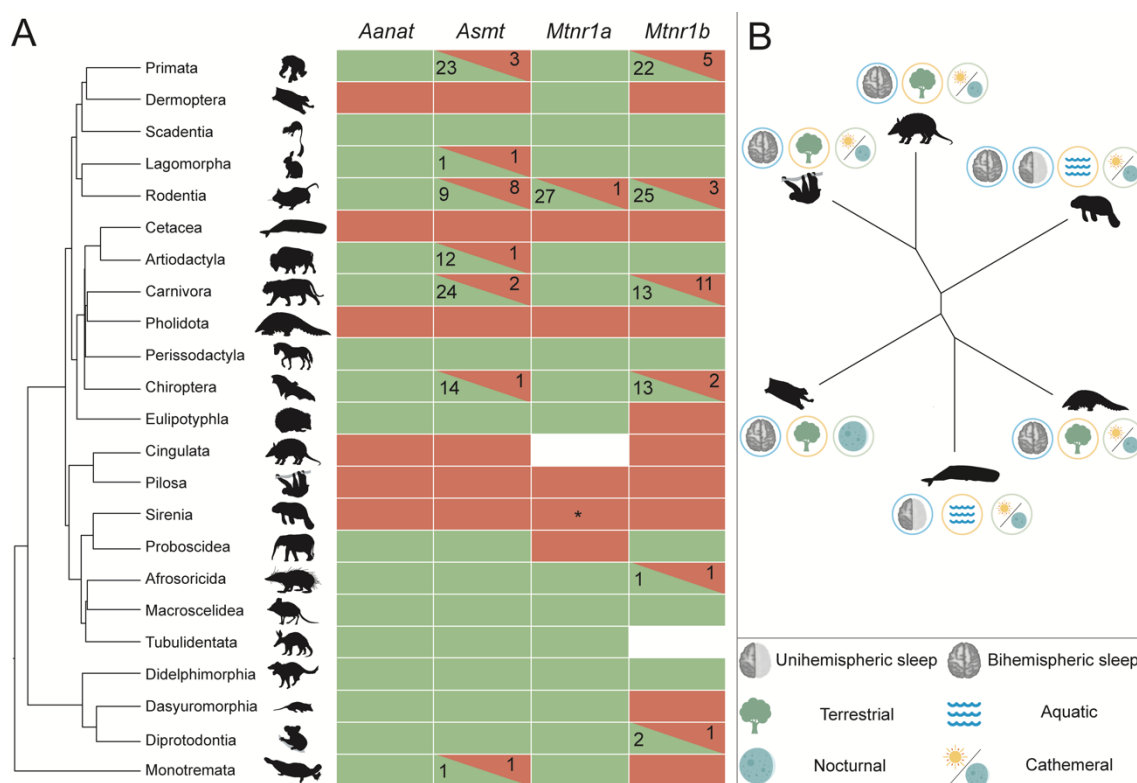

334

335 Figure 4: Mutational landscape of melatonin synthesis and signalling genes along the mammalian tree.

336 For each gene, we represented in green the orders where no ORF-disrupting mutations (frameshift

337 mutations, in-frame premature stop codons, loss of canonical splicing site or exon deletions) were

338 found across all members. On the other hand, orders where all members presented ORF-disrupting

339 mutations are highlighted in red. In orders (and in genes) with no consensual disruption pattern,

340 number of species presenting a coding/non-coding sequence were depicted respectively. Species

341 where no SRA validation was possible, were not included in this figure. \* indicates the presence of

342 contradictory reports in *Mtnr1a* for *Trichechus manatus latirostris*. Phylogenetic relationships were

343 adapted from Vazquez et al. (2018). (A) Summary characterization of mammalian lineages presenting

344 complete molecular erosion of melatonin synthesis and signalling genes, regarding their sleep type,

345 habitat and lifestyle. (B)

346

#### 347 4. Discussion

348 Here, we set out to investigate how evolutionary genomic signatures might untangle

349 the physiological status of controversial vestigial structures, using the pineal gland as

350 a case study (Pévet, 2002). For this, we addressed the evolution of a melatonin-

351 related gene hub, encompassing melatonin synthesis and signaling genes, in

352 Xenarthra and other mammals. Our results strongly suggest a complete landscape of

353 gene loss in Xenarthra, which further reinforce reports suggesting the lack of a pineal

354 gland in several members of this superorder (Quay, 1965; Harlow et al., 1981; Benítez

355 et al., 1994, Ferrari 1998; Freitas 2019). On the other hand, in species in which a pineal  
356 gland was described (e.g., Freitas et al., 2019), the present data suggests that, despite  
357 the anatomical observations, the canonical pineal gland physiology leading to  
358 melatonin secretion is likely disrupted. Nevertheless, similarly to what was described  
359 for *Tursiops truncatus* (bottlenose dolphin) (Panin et al., 2012), previous  
360 radioimmunoassay methods have reported the presence of melatonin circulating in  
361 *D. novemcinctus* (Harlow et al., 1981), implying either the existence of independent  
362 pathways for melatonin synthesis and signaling (Slominski et al., 2003; Tan et al.,  
363 2016) or possible acquisition of melatonin from food sources (Tan et al., 2010).  
364 This strong genomic signature leading to the anatomical and/or physiological atrophy  
365 of this endocrine gland might be viewed as an adaptive solution to overcome  
366 physiological limitations. Described as cathemeral (irregular daily activity pattern)  
367 and heterothermic species (Eisenberg & Redford, 1999) with limited capacity to  
368 regulate their body temperature, Xenarthrans' movements are heavily influenced by  
369 air temperature (Greggor, 1985; Camilo-Alves & Mourão, 2006; Giné et al., 2015; Attias  
370 et al., 2018). Thus, to reduce such energetic costs, Xenarthrans may have suffered  
371 reductive episodes, allowing behavioral strategies to overcome unfavorable  
372 environmental conditions and mitigate thermal limitations (Yin et al., 2021).  
373 Accordingly, convergent disruptive patterns with lineages also presenting labile body  
374 temperature and suggestive bizarre sleeping patterns (Pholidota; Mc Nab, 1984;  
375 Heath & Hammel, 1986; Weber et al., 1986; Imam et al., 2018; Yin et al., 2021) or living  
376 in environments with specific thermal constraints (Cetacea and *Trichechus manatus*  
377 *latirostris* (Florida manatee); Huelsmann et al., 2019; Lopes-Marques et al., 2019b; Yin  
378 et al., 2021), make it plausible to hypothesize that, in these species, inactivation of  
379 melatonin-related genes can be related with changes in their circadian rhythmicity. In  
380 addition, pseudogenization of these genes possibly paralleled loss of other circadian  
381 rhythm related genes, namely Cortistatin gene, that encodes a pleiotropic  
382 neuropeptide with an important role in sleep physiology (Valente et al., 2021). Given  
383 that the evolution of melatonin-related genes should be directly linked with pineal  
384 gland function, by inferring their coding status we were able to deduce if the organ  
385 constitutes an evolutionary vestige, despite the conflicting anatomical reports. More  
386 importantly, the present study provides a clear case-study on how genomic data can

387 be used to disentangle whether a specific organ constitutes a functional or vestigial  
388 structure (Hiller et al., 2012).

389

## 390 **5. Conclusion**

391 To date, no unequivocal inferences on the functional status of pineal gland across  
392 mammals were provided, with anatomical observations in several species from  
393 different clades presenting conflicting conclusions. However, by making use of  
394 genomic data, our results provide solid evidence for pineal gland vestigiality not only  
395 in Xenarthra, but also in other mammalian lineages. Thus, we argue that analysis of  
396 genomic changes might constitute a powerful approach to gain insights into the  
397 vestigiality of specific organs.

398

### 399 **. Funding**

400 This work is a result of the project ATLANTIDA (ref. NORTE-01-0145-FEDER-000040),  
401 supported by the Norte Portugal Regional Operational Programme (NORTE 2020),  
402 under the PORTUGAL 2020 Partnership Agreement and through the European  
403 Regional Development Fund (ERDF). One PhD fellowship for author R.V.  
404 (SFRH/BD/144786/2019) was granted by Fundação para a Ciência e Tecnologia (FCT,  
405 Portugal) under the auspices of Programa Operacional Regional Norte (PORN),  
406 supported by the European Social Fund (ESF) and Portuguese funds (MECTES).

407

### 408 **. Author's contributions**

409 **Raul Valente:** Data curation, Formal analysis, Investigation, Methodology,  
410 Visualization, Writing - original draft **Filipe Alves:** Writing - review & editing **Isabel**  
411 **Sousa-Pinto:** Writing - review & editing **Raquel Ruivo:** Conceptualization,  
412 Methodology, Validation, Writing - review & editing **Luís Filipe Costa de Castro:**  
413 Conceptualization, Methodology, Validation, Supervision, Project administration,  
414 Resources, Writing - review & editing

415

### 416 **. Acknowledgements**

417 We acknowledge the various genome consortiums for sequencing and assembling  
418 the genomes.

419

420 **. Declaration of Competing Interest**

421 The authors declare that they have no competing interests.

422

423 **. References**

424

425 Albalat, R., Cañestro, C., 2016. Evolution by gene loss. *Nat. Rev. Genet.* 17, 379–391.

426 <https://doi.org/10.1038/nrg.2016.39>

427

428 Allmon, W.D., Ross, R.M., 2018. Evolutionary remnants as widely accessible evidence  
429 for evolution: the structure of the argument for application to evolution education.

430 *Evol. Educ. Outreach* 11, 1. <https://doi.org/10.1186/s12052-017-0075-1>

431

432 Alves, L.Q., Alves, J., Ribeiro, R., Ruivo, R., Castro, F. 2019. The dopamine receptor D5  
433 gene shows signs of independent erosion in toothed and baleen whales. *PeerJ* 7,  
434 e7758. <https://doi.org/10.7717/peerj.7758>

435

436 Alves, L.Q., Ruivo, R., Fonseca, M.M., Lopes-Marques, M., Ribeiro, P., Castro, L.F.C.,  
437 2020. PseudoChecker: an integrated online platform for gene inactivation inference.  
438 *Nucleic Acids Res.* 48, W321–W331. <https://doi.org/10.1093/nar/gkaa408>

439

440 Attias, N., Oliveira-Santos, L.G.R, Fagan, W.F., Mourão, G., 2018. Effects of air  
441 temperature on habitat selection and activity patterns of two tropical imperfect  
442 homeotherms. *Animal Behav.* 140, 129–140.

443

444 Axelrod, J., Wurtman, R.J., Winget, C.M., 1964. Melatonin synthesis in the Hen pineal  
445 and its control by light. *Nature* 201, 1134.

446

447 Benítez, I., Aldana Marcos, H.J., Affanni, J.M., 1994. The encephalon of  
448 *Chaetophractus villosus*. A general view of its most salient features. *Comun. Biol.* 12,  
449 57–73.

450



- 451 Castro, L.F.C., Gonçalves, O., Mazan, S., Tay, B.-H., Venkatesh, B., Wilson, J.M., 2014.  
452 Recurrent gene loss correlates with the evolution of stomach phenotypes in gna-  
453 thostome history. *Proc. R. Soc. B: Biol. Sci.*, 281  
454
- 455 Camilo-Alves, C.S.P., Mourão, G.M., 2006. Responses of a specialized insectivorous  
456 mammal (*Myrmecophaga tridactyla*) to variation in ambient temperature. *Biotropica*  
457 38, 52–56.  
458
- 459 Chiarello, A.G., 1998. Activity budgets and ranging patterns of the Atlantic forest  
460 maned sloth *Bradypus torquatus* (Xenarthra: Bradypodidae). *J. Zool.* 246, 1–10.  
461
- 462 Cronk, Q., 2009. *The Molecular Organography of Plants*. Oxford University Press,  
463 Oxford.  
464
- 465 Darwin, C., 1859. *On the origin of species by means of natural selection or the*  
466 *preservation of favoured races in the struggle of life*. John Murray Press, London.  
467
- 468 Di Blanco, Y.E., Spørring, K.L., Di Bitetti, M.S., 2017. Daily activity pattern of re-  
469 introduced giant anteaters (*Myrmecophaga tridactyla*): effects of seasonality and  
470 experience. *Mammalia* 81, 11–21.  
471
- 472 Eisenberg, J.F., Redford, K.H., 1999. *Mammals of the Neotropics*. vol. 3, the central  
473 Neotropics: Ecuador, Peru, Bolivia, Brazil. University of Chicago Press, Chicago.  
474
- 475 Esfeld, K., Berardi, A.E., Moser, M., Bossolini, E., Freitas, L., Kuhlemeier, C., 2018.  
476 Pseudogenization and resurrection of a speciation gene. *Curr. Biol.* 28, 3776–3786.  
477
- 478 Fang, X., Seim, I., Huang, Z., Gerashchenko, M.V., Xiong, Z., Turanov, A.A., Zhu, Y.,  
479 Lobanov, A.V., Fan, D., Yim, S.H., Yao, X., Ma, S., Yang, L., Lee, S., Buffenstein, R.,  
480 Zhou, X., Krogh, A., Kim, E.B., Bronson, R.T., Sumbera, R., Park, T.J., Zhang, G., Wang,  
481 J., Gladyshev, V.N., 2014. Adaptations to a subterranean environment and longevity  
482 revealed by the analysis of mole rat genomes. *Cell Rep.* 8, 1–11.

483

484 Ferrari, C.C., Marcos, H.J.A., Carmanchahi, P.D., Benítez, I., Affanni, J.M., 1998. The  
485 Brain of the Armadillo *Dasypus hybridus*. A general view of its most salient features.  
486 Biocell, 22, 123–140.

487

488 Freitas, L.M., dos Santos, O.P., Santos, A.L.Q., Rodrigues de Melo, F., Silveira, L.,  
489 Jácomo, A.T.A., Pereira, K.F., Lima, F.C., 2019. Brain anatomy of two-toed sloth  
490 (*Choloepus didactylus*, Linnaeus, 1758): A comparative gross anatomical study of  
491 extant xenarthrans. Anat. Histol.  
492 Embryol. 49, 130–143. <https://doi.org/10.1111/ahe.12501>

493

494 Giné, G.A.F., Cassano, C.R., de Almeida, S.S., Faria, D., 2015. Activity budget, pattern  
495 and rhythm of maned sloths (*Bradypus torquatus*): responses to variations in ambient  
496 temperature. Mammal Biol. 80, 459–467.  
497 <https://doi.org/10.1016/j.mambio.2015.07.003>

498

499 Greegor, D.H.Jr., 1985. Ecology of the little hairy armadillo *Chaetophractus vellerosus*.  
500 In: Montgomery, G.G. (Eds.), The evolution and ecology of armadillos, sloths and  
501 vermilinguas. Smithsonian Institution Press, Washington D.C., pp. 397–405.

502

503 Guijarro-Clarke, C., Holland, P.W.H., Paps, J. 2020. Widespread patterns of gene loss  
504 in the evolution of the animal kingdom. Nat. Ecol. Evol. 4, 519–523.  
505 <https://doi.org/10.1038/s41559-020-1159-9>

506

507 Harlow, H.J., Phillips, J.A., Ralph, C.L., 1981. Daynight rhythm in plasma melatonin in a  
508 mammal lacking a distinct pineal gland, the nine-banded armadillo. Gen. Comp.  
509 Endocrinol. 45, 212–218. [https://doi.org/10.1016/0016-6480\(81\)90106-4](https://doi.org/10.1016/0016-6480(81)90106-4)

510

511 Harlow, H.J., Phillips, J.A., Ralph, C.L., 1982. Circadian rhythms and the effects of  
512 exogenous melatonin in the ninebanded armadillo, *Dasypus novemcinctus*: a mammal  
513 lacking a distinct pineal gland. Physiol. Behav. 29, 307–313.

514

- 515 Heath, M.E., Hammel, H.T., 1986. Body temperature and rate of O<sub>2</sub> consumption in  
516 Chinese pangolins. *Am. J. Physiol. Regul. Integr. Comp. Physiol.* 250, 377–382.  
517
- 518 Hiller, M., Schaar, B.T., Indjeian, V.B., Kingsley, D.M., Hagey, L.R., Bejerano G, 2012. A  
519 “forward genomics” approach links genotype to phenotype using independent  
520 phenotypic losses among related species. *Cell Rep.* 2(4), 817–23.  
521
- 522 Huelsmann, M., Hecker, N., Springer, M.S., Gatesy, J., Sharma, V., Hiller, M., 2019.  
523 Genes lost during the transition from land to water in cetaceans highlight genomic  
524 changes involved in aquatic adaptations. *Sci. Adv.* 5 (9), eaaw6671.  
525 <https://doi.org/10.1126/sciadv.aaw6671>  
526
- 527 Imam, A., Bhagwandin, A., Ajao, M.S., Manger, P.R., 2018. The brain of the tree  
528 pangolin (*Manis tricuspis*). V. The diencephalon and hypothalamus. *J. Comp. Neurol.*  
529 527, 2413–2439. <https://doi.org/10.1002/cne.24619>  
530
- 531 Jacob, S., Zelano, B., Gungor, A., Abbott, D., Naclerio, R., McClintock, M.K., 2000.  
532 Location and gross morphology of the nasopalatine duct in human adults. *Arch.*  
533 *Otolaryngol. Head Neck Surg.* 126, 741–748.  
534
- 535 Kim, E.B., Fang, X., Fushan, A.A., Huang, Z., Lobanov, A.V., Han, L., Marino, S.M., Sun,  
536 X., Turanov, A.A., Yang, P., Yim, S.H., Zhao, X., Kasaikina, M.V., Stoletzki, N., Peng, C.,  
537 Polak, P., Xiong, Z., Kiezun, A., Zhu, Y., Chen, Y., Kryukov, G.V., Zhang, Q., Peshkin, L.,  
538 Yang, L., Bronson, R.T., Buffenstein, R., Wang, B., Han, C., Li, Q., Chen, L., Zhao, W.,  
539 Sunyaev, S.R., Park, T.J., Zhang, G., Wang, J., Gladyshev, V.N., 2011. Genome  
540 sequencing reveals insights into physiology and longevity of the naked mole rat.  
541 *Nature* 479, 223–227.  
542
- 543 Klein, D., Coon, S., Roseboom, P., Weller, J.L., Bernard, M., Gastel, J.A., Zatz, M.,  
544 Iuvone, P., Rodriguez, I., Bégay, V., Falcón, J., Cahill, G.M., Cassone, V.M., Baler, R.,  
545 1997. The melatonin rhythm-generating enzyme: Molecular regulation of serotonin  
546 N-acetyltransferase in the pineal gland. *Recent Prog. Horm. Res.* 52, 307–357.

547

548 Lewy, A.J., Wehr, T.A., Goodwin, F.K., Newsome, D.A., Markey, S.P., 1980. Light  
549 suppresses melatonin secretion in humans. *Science* 210, 1267 – 1269.

550

551 Lindblad-Toh, K., Garber, M., Zuk, O., Lin, M.F., Parker, B.J., Washietl, S., Kheradpour,  
552 P., Ernst, J., Jordan, G., Mauceli, E., et al., 2011. A high-resolution map of human  
553 evolutionary constraint using 29 mammals. *Nature* 478, 476–482.

554

555 Lopes-Marques, M., Machado, A.M., Alves, L.Q., Fonseca, M.M., Barbosa, S., Sinding  
556 M-H.S., Rasmussen, M.H., Iversen, M.R., Bertelsen, M.F., Campos, P.F., Da Fonseca,  
557 R., Ruivo, R., Castro, L.F.C., 2019a. Complete inactivation of sebum-producing genes  
558 parallels the loss of sebaceous glands in Cetacea. *Mol. Biol. Evol.* 36 (6), 1270–1280.  
559 <https://doi.org/10.1093/molbev/msz068>.

560

561 Lopes-Marques, M., Ruivo, R., Alves, L.Q., Sousa, N., Machado, A.M., Castro, L.F.C.,  
562 2019b. The singularity of Cetacea behavior parallels the complete inactivation of  
563 melatonin gene modules. *Genes* 10(2), 121. <https://doi.org/10.3390/genes10020121>

564

565 Lopes-Marques, M., Alves, L.Q., Fonseca, M.M., Secci-Petretto, G., Machado, A.M.,  
566 Ruivo, R., Castro, L.F.C. 2019c. Convergent inactivation of the skin-specific CC motif  
567 chemokine ligand 27 in mammalian evolution. *Immunogenetics* 71(5), 363–372.  
568 <https://doi.org/10.1007/s00251-019-01114-z>

569

570 Maccarini, T.B., Attias, N., Medri, I.M., Marinho-Filho, J., Mourão, G.M., 2015.  
571 Temperature influences the activity patterns of armadillo species in a large  
572 neotropical wetland. *Mamm. Res.* 60, 403–409.

573

574 McGaugh, S.E., Gross, J.B., Aken, B., Blin, M., Borowsky, R., Chalopin, D., Hinaux, H.,  
575 Jeffery, W.R., Keene, A., Ma, L., Minx, P., Murphy, D., O’Quin, K.E., Rétaux, S., Rohner,  
576 N., Searle, S.M.J., Stahl, B.A., Tabin, C., Volff, J.-N., Yoshizawa, M., Warren, W.C., 2014.  
577 The cavefish genome reveals candidate genes for eye loss. *Nat Commun.* 5, 5307.

578

- 579 Mc Nab, B.K., 1979. The influence of body size on the energetics and distribution of  
580 fossorial and burrowing mammals. *Ecology* 60, 1010–1021.  
581
- 582 Mc Nab, B.K., 1980. Energetics and the limits to a temperate distribution in armadillos.  
583 *J. Mammal.* 61, 606–627.  
584
- 585 Mc Nab, B.K., 1984. Physiological convergence amongst ant-eating and termite-  
586 eating mammals. *J. Zool. (Lond.)* 203, 485–510.  
587
- 588 Mc Nab, B.K., 1985. Energetics, population biology and distribution of xenarthrans  
589 living and extinct. In: Montgomery, G.G. (Ed.), *The Evolution and Ecology of*  
590 *Armadillos, Sloths and Vermilinguas*. Smithsonian Institution Press,  
591 Washington/London, pp. 219–232.  
592
- 593 Murphy, W.J., Pringle, T.H., Crider, T.A., Springer, M.S., Miller, W., 2007. Using  
594 genomic data to unravel the root of the placental mammal phylogeny. *Genome Res.*  
595 17, 413–421.  
596
- 597 Nweeia, M.T., Eichmiller, F.C., Hauschka, P.V., Tyler, E., Mead, J.G., Potter, C.W.,  
598 Angnatsiak, D.P, Richard, P.R., Orr, J.R., Black, S.R., 2012. Vestigial tooth anatomy and  
599 tusk nomenclature for *Monodon monoceros*. *Anat. Rec.* 295, 1006–1016.  
600
- 601 Oksche, A., 1965. Survey of the development and comparative morphology of the  
602 pineal organ. *Prog. Brain Res.* 10, 3–29.  
603
- 604 O’Leary, M.A., Bloch, J.I., Flynn, J.J., Gaudin, T.J., Giallombardo, A., Giannini, N.P.,  
605 Goldberg, S.L., Kraatz, B.P., Luo, Z.-X., Meng, J., et al., 2013. The placental mammal  
606 ancestor and the post-K-Pg radiation of placentals. *Science* 339, 662–667.  
607
- 608 Olson, M.V., 1999. When less is more: gene loss as an engine of evolutionary change.  
609 *Am. J. Hum. Genet.* 64, 18–23.  
610

- 611 Panin, M., Gabai, G., Ballarin, C., Peruffo, A., Cozzi, B, 2012. Evidence of melatonin  
612 secretion in cetaceans: Plasma concentration and extrapineal HIOMT-like presence in  
613 the bottlenose dolphin *Tursiops truncatus*. *Gen. Comp. Endocrinol.* 177, 238–245.  
614
- 615 Pévet, P., 2002. Melatonin. *Dialogues Clin. Neurosci.* 4, 57–72.  
616
- 617 Quay, W., 1965. Histological structure and cytology of the pineal organ in birds and  
618 mammals. In: Kappers, J., Schade, J. (Eds.), *Progress in brain research, Structure and*  
619 *function of the epiphysis Cerebri*, vol 10. Elsevier, New York, pp. 49–  
620 86. [https://doi.org/10.1016/S0079-6123\(08\)63447-0](https://doi.org/10.1016/S0079-6123(08)63447-0)  
621
- 622 Ralph, C.L., 1975. The pineal gland and geographical distribution of animals. *Int. J.*  
623 *Biometeorol.* 19, 289–303.  
624
- 625 Ralph, C.L., Young, S., Gettinger, R., O’Shea, T.J., 1985. Does the manatee have a  
626 pineal body? *Acta Zool.* 66, 55–60.  
627
- 628 Reppart, S.M., Weaver, D.R., Godson, C., 1996. Melatonin receptors step into the  
629 light: Cloning and classification of subtypes. *Trends Pharmacol. Sci.* 17, 100–102.  
630
- 631 Simonneaux, V., Ribelayga, C., 2003. Generation of the melatonin endocrine message  
632 in mammals: A review of the complex regulation of melatonin synthesis by  
633 norepinephrine, peptides, and other pineal transmitters. *Pharmacol. Rev.* 55, 325.  
634
- 635 Slominski, A., Pisarchik, A., Semak, I., Sweatman, T., Wortsman, J., 2003.  
636 Characterization of the serotonergic system in the C57BL/6 mouse skin. *Eur. J.*  
637 *Biochem.* 270, 3335–3344.  
638
- 639 Springer, M.S., Guerrero-Juarez, C.F., Huelsmann, M., Collin, M.A., Danil, K.,  
640 McGowen, M.R., Oh, J.W., Ramos, R., Hiller, M., Plikus, M.V., Gatesy, J., 2021. Genomic  
641 and anatomical comparisons of skin support independent adaptation to life in water  
642 by cetaceans and hippos. *Current Biology* (in press).

643

644 Superina, M., Loughry, W.J., 2015. Why do xenarthrans matter? *J. Mammal.* 96, 617–  
645 621. <https://doi.org/10.1093/jmammal/gyv099>

646

647 Tan, D.X., Hardeland, R., Manchester, L.C., Paredes, S.D., Korkmaz, A., Sainz, R.M.,  
648 Mayo, J.C., Fuentes-Broto, L., Reiter, R.J., 2010. The changing biological roles of  
649 melatonin during evolution: From an antioxidant to signals of darkness, sexual  
650 selection and fitness. *Biol. Rev. Camb. Philos. Soc.* 85, 607–623.

651

652 Tan, D.X., Hardeland, R., Back, K., Manchester, L.C., Alatorre-Jimenez, M.A., Reiter,  
653 R.J., 2016. On the significance of an alternate pathway of melatonin synthesis via 5-  
654 methoxytryptamine: Comparisons across species. *J. Pineal Res.* 61, 27–40.

655

656 Themudo, G.E., Alves, L.Q., Machado, A.M., Lopes-Marques, M., da Fonseca, R.R.,  
657 Fonseca, M., et al. (2020). Losing genes: the evolutionary remodeling of Cetacea skin.  
658 *Front. Mar. Sci.* 7, 912.

659

660 Uliano-Silva, M., Winkler, S., Myers, E., Mazzoni, C., 2019. Slothomics: the first  
661 chromosome-level genome of the slowest existing mammalian group. The G10K-  
662 VGP/EBP 2019 Meeting Agenda, Manhattan, New York, August 2019. Poster  
663 presentation

664

665 Valente, R., Alves, L.Q., Nabais, M., Alves, F., Sousa-Pinto, I., Ruivo, R., Castro, L.F.C.,  
666 (2021). Convergent Cortistatin losses parallel modifications in circadian rhythmicity  
667 and energy homeostasis in Cetacea and other mammalian lineages. *Genomics* 113(1),  
668 1064-1070. <https://doi.org/10.1016/j.ygeno.2020.11.002>

669

670 Vazquez, J.M., Sulak, M., Chigurupati, S., Lynch, V.J., 2018. A zombie LIF gene in  
671 elephants is upregulated by TP53 to induce apoptosis in response to DNA damage.  
672 *Cell Rep.* 24 (7), 1765–1776.

673

674 Weber, R.E., Heath, M.E., White, F.N., 1986. Oxygen binding functions of blood and  
675 hemoglobin from the Chinese pangolin, *Manis pentadactyla*: possible implications of  
676 burrowing and low body temperature. *Respir. Physiol.* 64, 103–112.

677

678 Werth, A.J., 2014. Vestiges of the natural history of development: historical holdovers  
679 reveal the dynamic interaction between ontogeny and phylogeny. *Evol. Educ.*  
680 *Outreach* 7, 12. <https://doi.org/10.1186/s12052-014-0012-5>

681

682 Yin, D., Zhou, R., Yin, M., Chen, Y., Xu, S., Yang, G., 2021. Gene duplication and loss of  
683 AANAT in mammals driven by rhythmic adaptations, *Mol. Biol. Evol.* msab125.  
684 <https://doi.org/10.1093/molbev/msab125>

685

686 Zoonomia Consortium, 2020. A comparative genomics multitool for scientific  
687 discovery and conservation. *Nature* 587, 240–245. [https://doi.org/10.1038/s41586-](https://doi.org/10.1038/s41586-020-2876-6)  
688 [020-2876-6](https://doi.org/10.1038/s41586-020-2876-6)
